# Supplementary material for: First year physical activity findings from turn up the HEAT (Healthy Eating and Activity Time) in summer day camps
Source: PubMed Central journal article supplement (PMC5369693; doi:10.1371/journal.pone.0173791), 2017-03-28
Supplement: pone.0173791.s003.pdf [file pone.0173791.s003.pdf]

Trial record **1 of 1** for: NCT02161809
[Previous Study](#) | [Return to List](#) | [Next Study](#)

## Turn up the HEAT - Healthy Eating and Activity Time in Summer Day Camps (HEPA)

**This study is ongoing, but not recruiting participants.**
**Sponsor:**

University of South Carolina

**Information provided by (Responsible Party):**

University of South Carolina

**ClinicalTrials.gov Identifier:**

NCT02161809

First received: June 10, 2014

Last updated: May 10, 2016

Last verified: May 2016

[History of Changes](#)
[Full Text View](#)
[Tabular View](#)
[No Study Results Posted](#)
[Disclaimer](#)
[How to Read a Study Record](#)

### ► Purpose

The investigators long-term goal is to increase the number of Summer Day Camps (SDC) that meet the National Afterschool Association Healthy Eating and Physical Activity (HEPA) Standards. The objective is to evaluate the effectiveness of a multi-component intervention designed to increase children's PA levels and improve the quality of lunches and snacks children consume in SDCs. The HEPA intervention is designed to target children, parents, staff, program leaders, and the SDC environment and uses a train-the-trainer model with SDC leaders to train their staff to deliver and integrate the intervention into routine practice. In the proposed study, the investigators will evaluate these HEPA strategies, using a 4-year randomized controlled trial with 20 SDCs. An important feature of the study will be the evaluation of maintenance of the intervention after the removal of research support (e.g., training, boosters) during the final year, as well as costs associated with implementation.

The investigators hypothesize that intervention SDCs will achieve significantly greater increases in HEPA, compared to control SDCs. The investigators expect the study to support the cost-effectiveness and maintenance of our strategies for promoting HEPA that will facilitate SDCs meeting newly-established HEPA standards for this setting.

| Condition         | Intervention                                     |
|-------------------|--------------------------------------------------|
| Childhood Obesity | Behavioral: Healthy Eating and Physical Activity |

Study Type: Interventional

Study Design: Allocation: Randomized

Intervention Model: Parallel Assignment

Masking: Open Label

Official Title: Turn up the HEAT - Healthy Eating and Activity Time in Summer Day Camps

**Resource links provided by NLM:**
[MedlinePlus](#) related topics: [Health Checkup](#)
[U.S. FDA Resources](#)
**Further study details as provided by University of South Carolina:**
**Primary Outcome Measures:**

- Changes in percentage of children meeting 60min of MVPA [ Time Frame: Year 1 - Year 4 ] [ Designated as safety issue: No ]  
Changes in percentage of children at each summer day camp that meet the National Afterschool Alliance Standard of 60 minutes of moderate-to-vigorous physical activity daily.

**Secondary Outcome Measures:**

- Change in percentage of children bringing/consuming healthy foods/beverages [ Time Frame: Year 1 - Year 4 ]  
[ Designated as safety issue: No ]

Trained observers will record the foods/beverages brought/consumed at SDC - snacks and lunches

Enrollment: 1000  
 Study Start Date: January 2015  
 Estimated Study Completion Date: August 2018  
 Estimated Primary Completion Date: August 2018 (Final data collection date for primary outcome measure)

| <u>Arms</u>                                                                                                                                                                                                                               | <u>Assigned Interventions</u>                                                                                                                                                                                                                                                                                                                                                                                                                                                                                                                    |
|-------------------------------------------------------------------------------------------------------------------------------------------------------------------------------------------------------------------------------------------|--------------------------------------------------------------------------------------------------------------------------------------------------------------------------------------------------------------------------------------------------------------------------------------------------------------------------------------------------------------------------------------------------------------------------------------------------------------------------------------------------------------------------------------------------|
| <p><b>Experimental: Physical Activity Intervention</b></p> <p>This arm (10 summer day camps) will receive the Physical Activity intervention the first year and both healthy eating and physical activity the second and third years.</p> | <p><b>Behavioral: Healthy Eating and Physical Activity</b></p> <p>The Healthy Eating and Physical Activity (HEPA) intervention aims to increase the quality of foods and beverages and physical activity opportunities in summer day camps. Through staff-level training, physical activity opportunities are modified to provide children with a substantial amount of meaningful physical activity. Through working with foods service providers, changes to the types of foods and beverages served will be made.</p> <p>Other Name: HEPA</p> |
| <p><b>Healthy Eating Intervention</b></p> <p>This arm (10 summer day camps) will receive the Healthy Eating intervention the first year and both healthy eating and physical activity the second and third years.</p>                     | <p><b>Behavioral: Healthy Eating and Physical Activity</b></p> <p>The Healthy Eating and Physical Activity (HEPA) intervention aims to increase the quality of foods and beverages and physical activity opportunities in summer day camps. Through staff-level training, physical activity opportunities are modified to provide children with a substantial amount of meaningful physical activity. Through working with foods service providers, changes to the types of foods and beverages served will be made.</p> <p>Other Name: HEPA</p> |

#### Detailed Description:

The investigators aim to:

Evaluate the impact of the HEPA interventions on: 1.) The proportion of children meeting the PA Standard (i.e.,  $\geq 60$ min MVPA/d) while attending summer day camp; 2.) The proportion of foods (e.g., fruit, vegetable, water) children and staff bring and consume at the summer day camp that meet the HE Standards; and 3/) Changes in children's age-sex specific BMI percentile from the start to end of summer

Evaluate the cost-effectiveness of the HEPA intervention

Evaluate the maintenance of the HEPA intervention in summer day camps

#### ► Eligibility

Ages Eligible for Study: 6 Years to 14 Years (Child)  
 Genders Eligible for Study: Both  
 Accepts Healthy Volunteers: No

#### Criteria

Inclusion Criteria:

- Summer Day camps will be eligible if:
- They operate for at least 10 weeks during the summer
- They do not have any primary focus such as sports, art, or tutoring (must be a general camp)
- Enrollment is at least 40 campers
- Operation hours are at least 8 hours.

Exclusion Criteria:

- Children will be unable to wear an activity monitor if experience any physical and/or orthopedic impairment that limits the child's ability to participate in regular PA (e.g., wheelchair user)

#### ► Contacts and Locations

Choosing to participate in a study is an important personal decision. Talk with your doctor and family members or friends about deciding to join a study. To learn more about this study, you or your doctor may contact the study research staff using the Contacts provided below. For general information, see [Learn About Clinical Studies](#).

Please refer to this study by its ClinicalTrials.gov identifier: NCT02161809

#### Locations

##### United States, South Carolina

University of South Carolina  
Columbia, South Carolina, United States, 29201

#### Sponsors and Collaborators

University of South Carolina

#### Investigators

Principal Investigator: Michael W Beets, PhD University of South Carolina

#### More Information

Responsible Party: University of South Carolina  
ClinicalTrials.gov Identifier: [NCT02161809](#) [History of Changes](#)  
Other Study ID Numbers: [1R01HD079372-01A1](#)  
Study First Received: June 10, 2014  
Last Updated: May 10, 2016  
Health Authority: United States: Institutional Review Board

Keywords provided by University of South Carolina:

MVPA  
Healthy Eating  
children  
childhood obesity

Additional relevant MeSH terms:

|                     |                    |
|---------------------|--------------------|
| Pediatric Obesity   | Overweight         |
| Obesity             | Body Weight        |
| Overnutrition       | Signs and Symptoms |
| Nutrition Disorders |                    |

ClinicalTrials.gov processed this record on November 21, 2016
